# Supplementary material
Source: PubMed Central journal article supplement (PMC5004960)

**Suppl. Table 1:** *Characteristics of chronic myelogenous leukaemia (CML) patients at diagnosis, of CML patients treated with dasatinib or imatinib after < 3 months of therapy and of healthy subjects for determination of serum concentrations of soluble intercellular adhesion molecule 1 (sICAM-1), soluble vascular cell adhesion molecule 1 (sVCAM-1) and soluble E-selectin (sE-selectin). F = female; N/A = no applicable; M = male*

|                         | Healthy subjects | CML patients (without PH) at diagnosis | CML patients (without PH) treated with dasatinib | CML patients (without PH) treated with imatinib |
|-------------------------|------------------|----------------------------------------|--------------------------------------------------|-------------------------------------------------|
| <b>n</b>                | 39               | 17                                     | 24                                               | 14                                              |
| <b>Age, years</b>       | 41.9 ± 2.1       | 49.3 ± 2.9                             | 42.5 ± 3.5                                       | 58.4 ± 4.5                                      |
| <b>Sex, M/F (ratio)</b> | 19/20 (0.95)     | 11/6 (1.83)                            | 15/9 (0.60)                                      | 11/3 (3.66)                                     |
| <b>Sokal risk score</b> |                  |                                        |                                                  |                                                 |
| Low                     | N/A              | 8                                      | 13                                               | 5                                               |
| Intermediate            | N/A              | 7                                      | 7                                                | 5                                               |
| High                    | N/A              | 2                                      | 4                                                | 4                                               |
| <b>Sokal score</b>      | N/A              | 0.85 ± 0.06                            | 0.88 ± 0.06                                      | 0.98 ± 0.08                                     |

**Suppl. Table 2: Primary antibodies used in this study.**

**Primary antibodies used for Western Blotting:**

|                         | <b>Company Names</b>      | <b>Catalog numbers</b> |
|-------------------------|---------------------------|------------------------|
| phospho-Erk1/2 (E-4)    | Santa Cruz Biotechnology  | sc-7383                |
| Erk2 (C-14)             | Santa Cruz Biotechnology  | sc-154                 |
| XBP-1 (M-186)           | Santa Cruz Biotechnology  | sc-7160                |
| GRP78 (H-129)           | Santa Cruz Biotechnology  | sc-13968               |
| ATF-6 $\alpha$ (H-280)  | Santa Cruz Biotechnology  | sc-22799               |
| EiF2 $\alpha$ (FL-315)  | Santa Cruz Biotechnology  | sc-11386               |
| p-EiF2 $\alpha$ (Ser51) | Cell signaling Technology | 3398                   |
| p-Src Family (Tyr416)   | Cell signaling Technology | 2101                   |
| Src (36D10)             | Cell signaling Technology | 2109                   |
| phopho-EiF2 (Ser51)     | Cell signaling Technology | 3398                   |
| $\beta$ -actin (AC-74)  | Sigma-Aldrich             | A2228                  |

**Primary antibodies used for Immunostaining:**

|                                     | <b>Company Names</b>     | <b>Catalog numbers</b> |
|-------------------------------------|--------------------------|------------------------|
| ICAM-1 (G-5)                        | Santa Cruz Biotechnology | sc-8439                |
| E-selectin (H-300)                  | Santa Cruz Biotechnology | sc-14011               |
| $\alpha$ -smooth muscle actin (1A4) | Santa Cruz Biotechnology | sc-32251               |
| CD68 (ED1)                          | Santa Cruz Biotechnology | sc-59103               |
| 8-oxo-dG                            | JalCA                    | MOG-020P               |
| VCAM-1                              | Abcam                    | ab134047               |
| CD3                                 | BD Pharmigen             | 550295                 |
| CD45                                | BD Pharmigen             | 550566                 |

**Suppl. Fig S1:** *Pharmacokinetic profile of dasatinib in 4-week-old male Wistar rats weighing 100 g.*

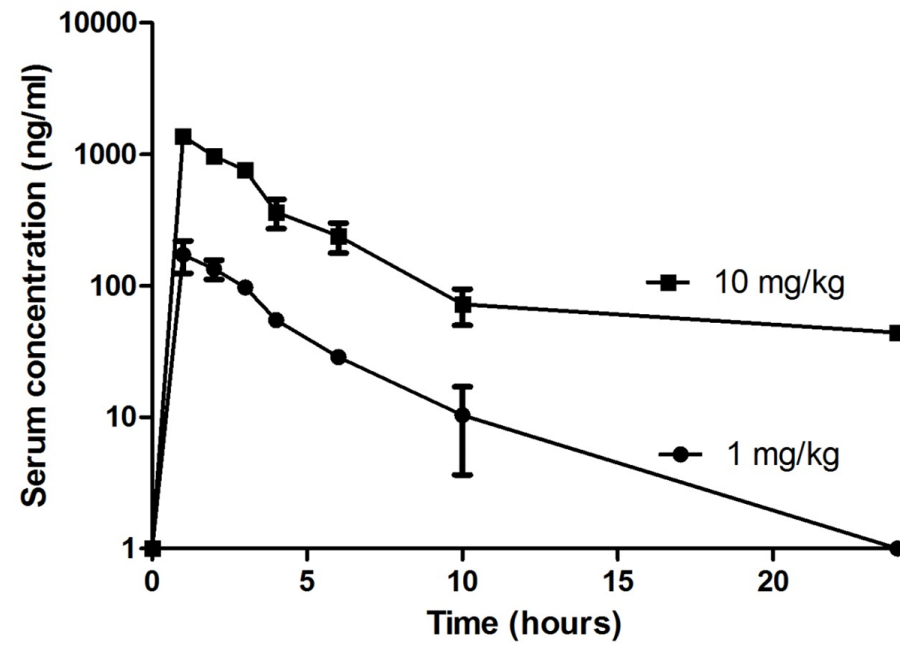

**Suppl. Fig S2: Representative images of CD68-, CD45- and CD3-stained sections of distal pulmonary arteries in vehicle- dasatinib- imatinib-treated rats and quantifications of the numbers of CD68-, CD45-, CD3-positive cells/vessels. Red arrowhead = CD68-, CD45, or CD3-positive cells. Scale bar = 20  $\mu$ m in all sections.**

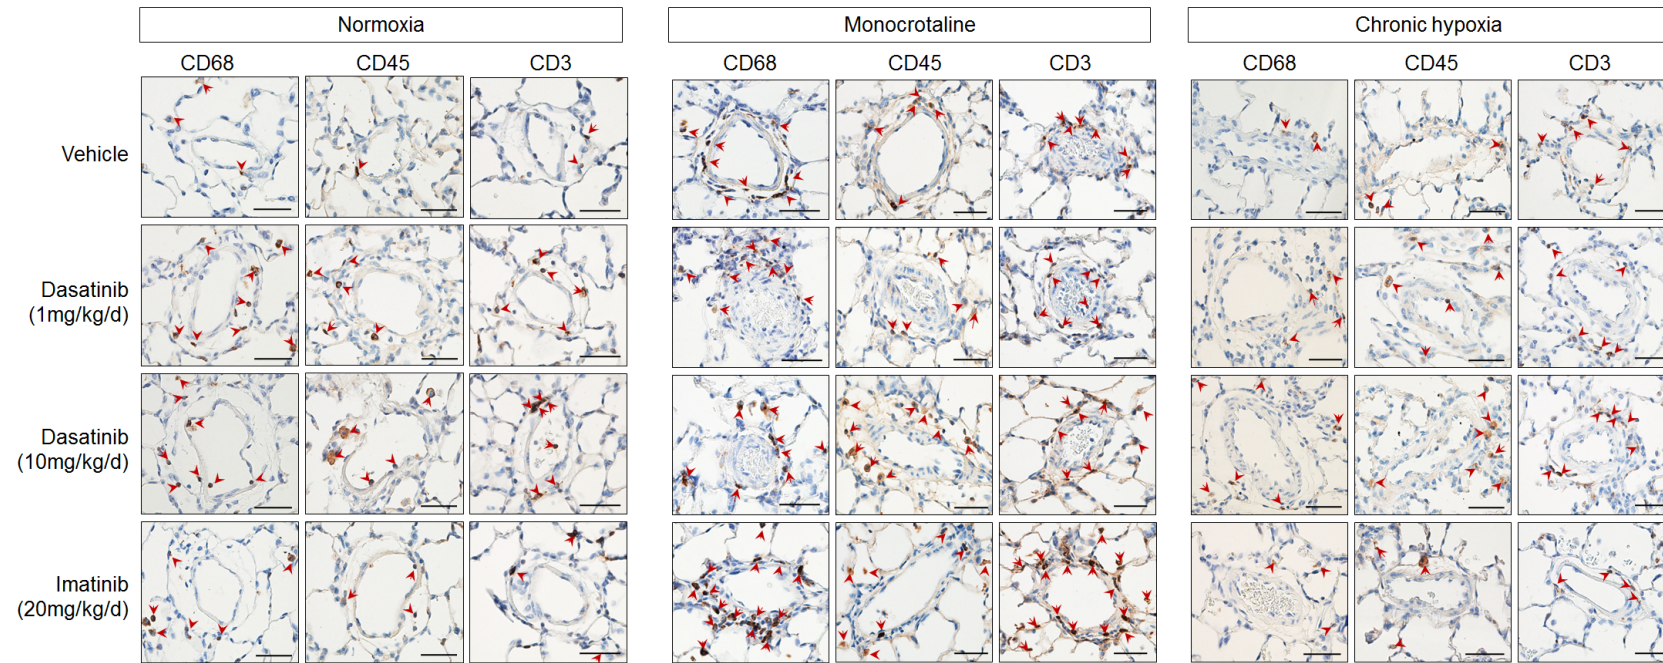

|                       | Normoxia               |                        |                        | Monocrotaline |           |            | Chronic hypoxia        |           |                        |
|-----------------------|------------------------|------------------------|------------------------|---------------|-----------|------------|------------------------|-----------|------------------------|
|                       | CD68                   | CD45                   | CD3                    | CD68          | CD45      | CD3        | CD68                   | CD45      | CD3                    |
| Vehicle               | 1.0 ± 1.1              | 0.9 ± 0.5              | 0.9 ± 0.7              | 9.9 ± 2.1     | 6.3 ± 2.0 | 10.5 ± 3.9 | 1.6 ± 1.0              | 3.2 ± 1.6 | 3.4 ± 2.2              |
| Dasatinib (1mg/kg/d)  | 4.6 ± 1.3 <sup>*</sup> | 3.1 ± 1.1 <sup>*</sup> | 4.4 ± 1.0 <sup>*</sup> | 6.9 ± 1.6     | 6.5 ± 1.4 | 10.3 ± 2.5 | 2.8 ± 1.5              | 2.7 ± 1.3 | 5.6 ± 1.8              |
| Dasatinib (10mg/kg/d) | 6.3 ± 1.8 <sup>*</sup> | 4.6 ± 1.4 <sup>*</sup> | 5.1 ± 1.6 <sup>*</sup> | 7.0 ± 2.0     | 7.7 ± 2.0 | 9.2 ± 2.1  | 4.0 ± 2.2 <sup>*</sup> | 3.7 ± 1.9 | 5.7 ± 1.8 <sup>*</sup> |
| Imatinib (20mg/kg/d)  | 2.5 ± 1.3              | 2.2 ± 1.3              | 2.4 ± 1.0 <sup>*</sup> | 7.7 ± 2.7     | 5.8 ± 1.5 | 13.7 ± 4.8 | 2.3 ± 0.9              | 1.7 ± 0.9 | 2.9 ± 1.4              |

**Suppl. Fig S3: Viable cell counts 2 hours (A) and 16 hours (B) following treatment with vehicle, dasatinib or imatinib. (C) Representative images and quantification of the TUNEL staining in human pulmonary ECs treated 16 hours with vehicle, dasatinib or imatinib.** Horizontal lines display the mean  $\pm$  SEM (n=3-5). \*\* p-value < 0.01; \*\*\*\* p-value < 0.0001 versus vehicle treated cells. ### p-value < 0.001; ##### p-value < 0.0001 versus human ECs treated with 400nM of dasatinib. Scale bar = 20  $\mu$ m in all sections. DAPI = 4' 6-diamidino-2-phenylindole; TUNEL = Terminal deoxynucleotidyl transferase dUTP nick end labeling.

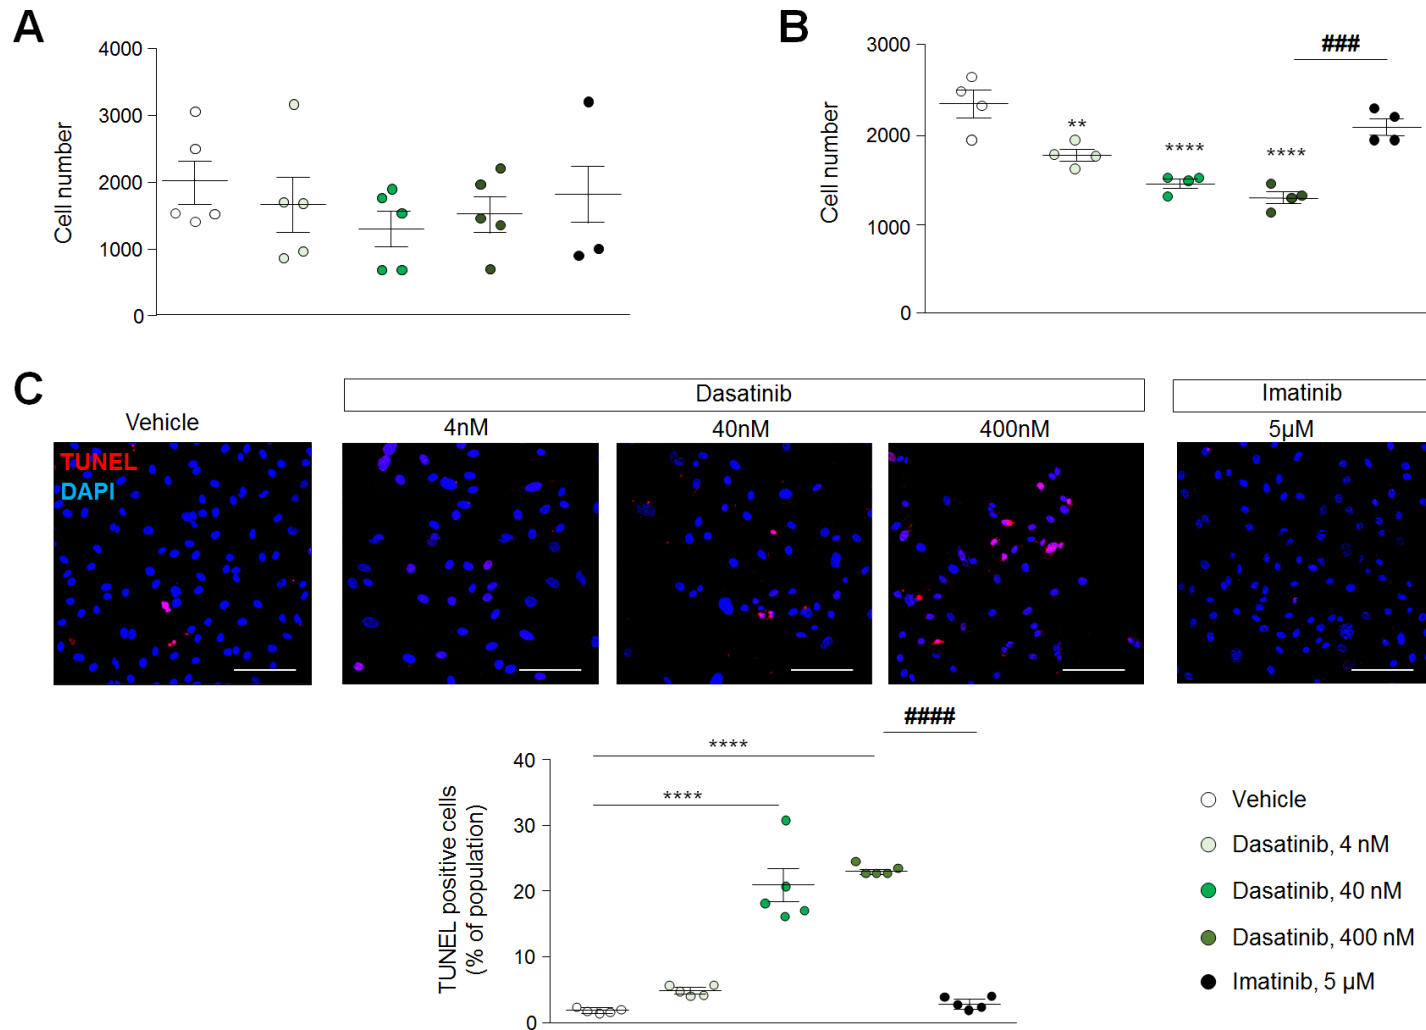

**Suppl. Fig S4:** Schematic representation of the proposed mechanism of dasatinib-induced PAH.

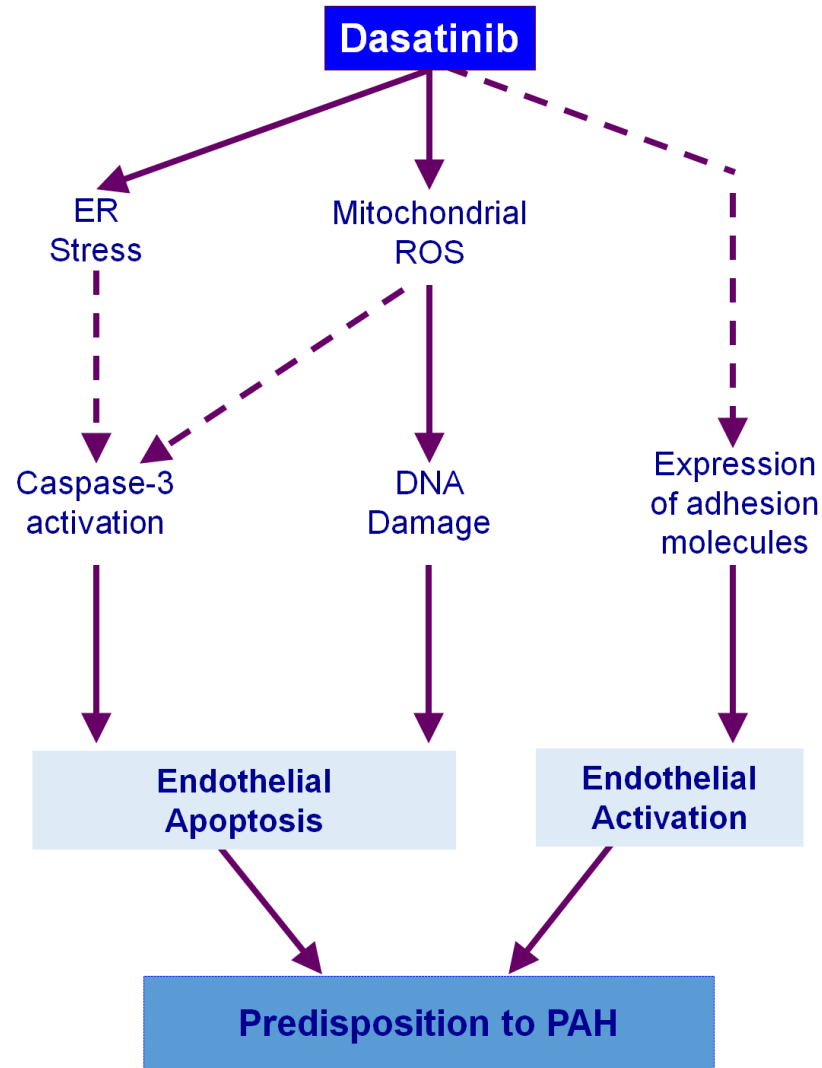

Supplement: JCI86249.sd.pdf [file JCI86249.sd.pdf]
